# Supplementary material for: Phthalazinone structure-based covalent triazine frameworks and their gas adsorption and separation properties
Source: Royal Society of Chemistry journal article supplement (doi:10.1039/c5ra23148e), 2016-01-01
Supplement: c5ra23148e1.pdf [file c5ra23148e1.pdf]

## Supporting Information

### Supplementary Figures:

Figure S1. <sup>1</sup>H-NMR spectrum of PHPZ-DN.

Figure S2. <sup>1</sup>H-NMR spectrum of THPZ-DN.

Figure S3. TGA thermograms of PHPZ-DN and THPZ-DN.

Figure S4. PXRD patterns of PHCTF-1a, PHCTF-1c, PHCTF-2a and PHCTF-2b.

Figure S5. TGA curves of PHCTF-1a, PHCTF-1c, PHCTF-2a and PHCTF-2b in nitrogen atmosphere.

Table S1. Elemental analysis data of PHCTFs.

Figure S6. Adsorption selectivity of CO<sub>2</sub> over CH<sub>4</sub> and N<sub>2</sub> for PHCTF-1a calculated from Henry's law initial slope method at 273 K.

Figure S7. Adsorption selectivity of CO<sub>2</sub> over CH<sub>4</sub> and N<sub>2</sub> for PHCTF-1b calculated from Henry's law initial slope method at 273 K.

Figure S8. Adsorption selectivity of CO<sub>2</sub> over CH<sub>4</sub> and N<sub>2</sub> for PHCTF-1c calculated from Henry's law initial slope method at 273 K.

Figure S9. Adsorption selectivity of CO<sub>2</sub> over CH<sub>4</sub> and N<sub>2</sub> for PHCTF-2a calculated from Henry's law initial slope method at 273 K.

Figure S10. Adsorption selectivity of CO<sub>2</sub> over CH<sub>4</sub> and N<sub>2</sub> for PHCTF-2b calculated from Henry's law initial slope method at 273 K.

### Experimental section:

Calculation methods for  $Q_{st}$ ,  $Q_0$ ,  $A_0$ ,  $K_H$  values:

The isosteric enthalpies ( $Q_{st}$ ) of CO<sub>2</sub> in PHCTFs were calculated from the adsorption isotherms measured at different temperatures in term of Clausius-Clapeyron equation:

$$\ln P = \frac{Q_{st}}{RT} + C \quad (1)$$

where  $R$ ,  $C$ ,  $P$  and  $T$  are the gas constant, equation constant, the pressure and temperature at the equilibrium state, respectively. The first virial coefficients ( $A_0$ ) are obtained from the slopes of the virial plots. From their intercepts,  $A_0$  values relating to gas-material interaction were calculated. Henry's law constants ( $K_H$ ) are calculated from the equation  $K_H = \exp(A_0)$ . Then, the limiting enthalpy of adsorption at zero surface CO<sub>2</sub> coverage ( $Q_0$ ) can be obtained in term of Vant Hoff equation:

$$\frac{d [\ln K_H]}{dT} = \frac{Q_0}{RT^2} \quad (2)$$

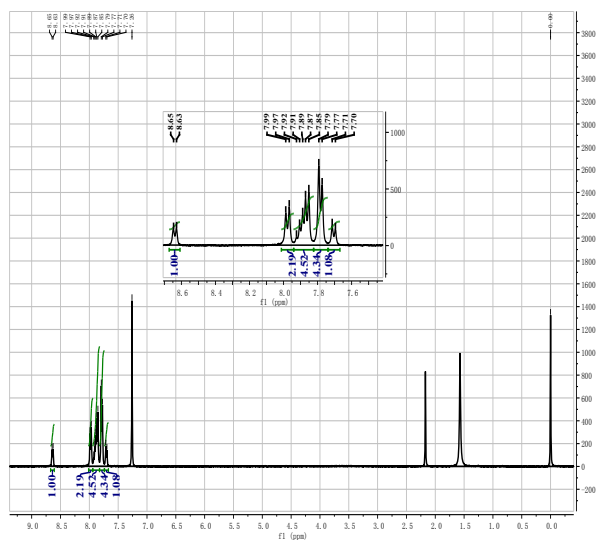

Figure S1.  $^1\text{H-NMR}$  spectrum of PHPZ-DN.

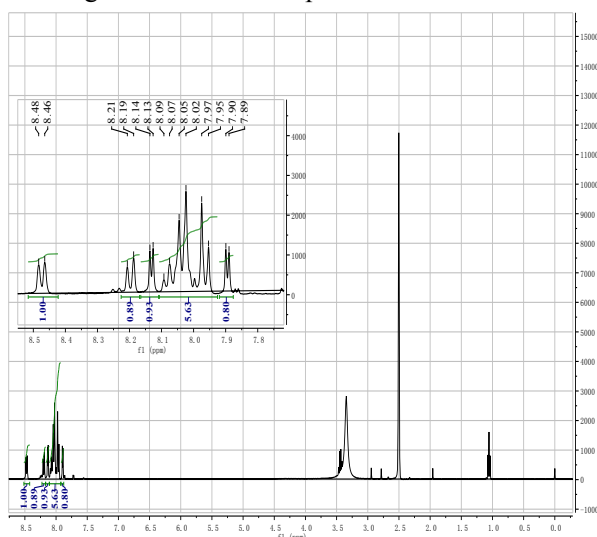

Figure S2.  $^1\text{H-NMR}$  spectrum of THPZ-DN.

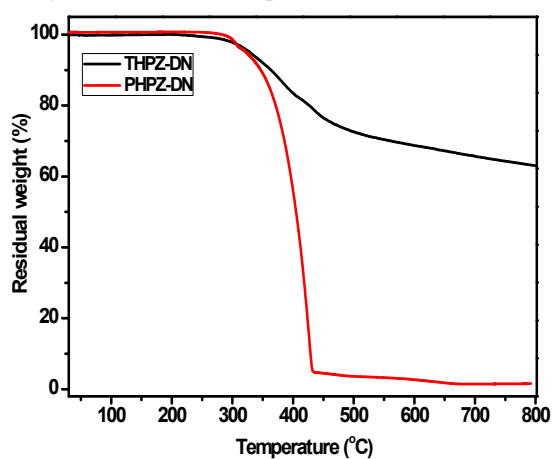

Figure S3. TGA thermograms of PHPZ-DN and THPZ-DN under nitrogen atmosphere.

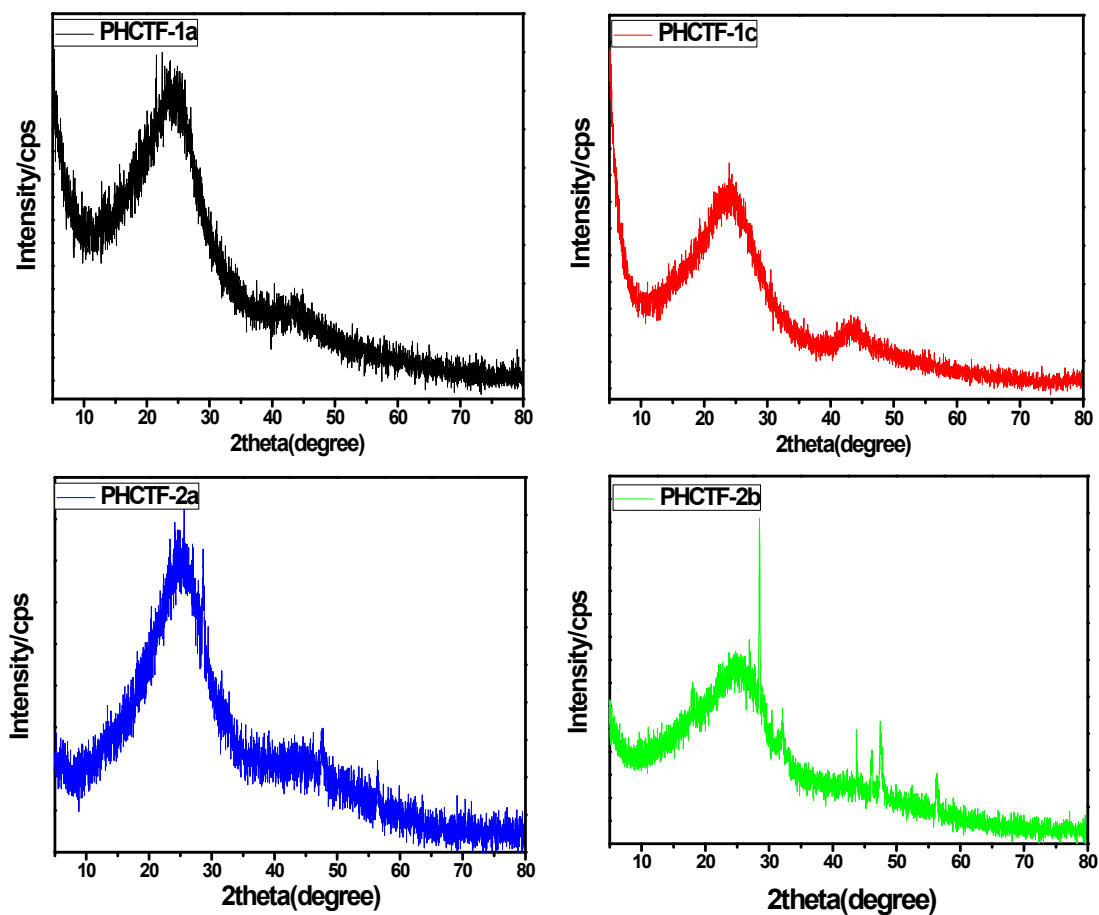

Figure S4. PXRD patterns of PHCTF-1a, PHCTF-1c, PHCTF-2a and PHCTF-2b.

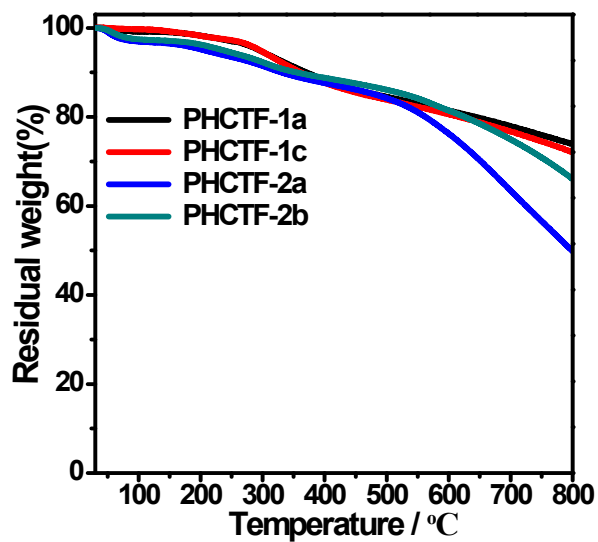

Figure S5. TGA curves of PHCTF-1a, PHCTF-1c, PHCTF-2a and PHCTF-2b in nitrogen atmosphere.

Table S1. Elemental analysis data of PHCTFs.

|          | Calculated(%) |     |      |     |     |      | Found(%) |     |      |     |      |      |
|----------|---------------|-----|------|-----|-----|------|----------|-----|------|-----|------|------|
|          | C             | H   | N    | S   | C/N | C/H  | C        | H   | N    | S   | C/N  | C/H  |
| PHCTF-1a | 75.9          | 3.5 | 16.1 | --  | 4.7 | 21.9 | 74.6     | 3.2 | 7.8  | --  | 9.5  | 23.2 |
| PHCTF-1b | 75.9          | 3.5 | 16.1 | --  | 4.7 | 21.9 | 74.3     | 3.0 | 7.4  | --  | 10.0 | 24.8 |
| PHCTF-1c | 75.9          | 3.5 | 16.1 | --  | 4.7 | 21.9 | 76.9     | 2.8 | 5.6  | --  | 13.7 | 27.5 |
| PHCTF-2a | 67.8          | 2.8 | 15.8 | 9.1 | 4.3 | 24.2 | 56.9     | 2.5 | 13.8 | 3.0 | 4.1  | 22.8 |
| PHCTF-2b | 67.8          | 2.8 | 15.8 | 9.1 | 4.3 | 24.2 | 56.1     | 2.3 | 13.3 | 3.1 | 4.2  | 24.4 |

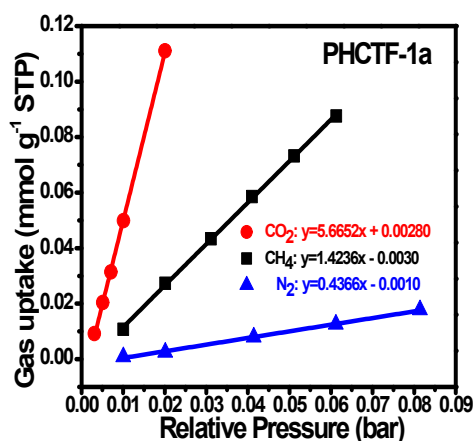

Figure S6. Adsorption selectivity of CO<sub>2</sub> over CH<sub>4</sub> and N<sub>2</sub> for PHCTF-1a calculated from Henry's law initial slope method at 273 K.

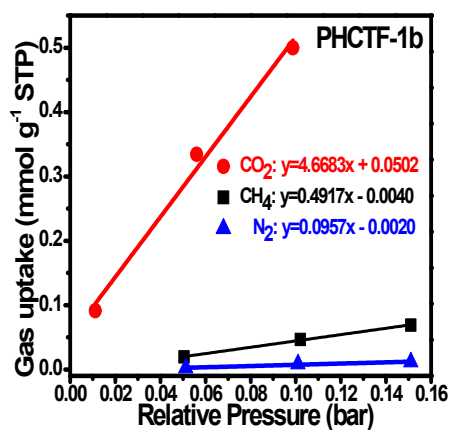

Figure S7. Adsorption selectivity of CO<sub>2</sub> over CH<sub>4</sub> and N<sub>2</sub> for PHCTF-1b calculated from Henry's law initial slope method at 273 K.

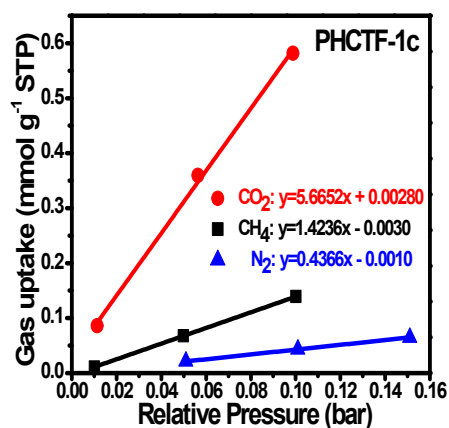

Figure S8. Adsorption selectivity of CO<sub>2</sub> over CH<sub>4</sub> and N<sub>2</sub> for PHCTF-1c calculated from Henry's law initial slope method at 273 K.

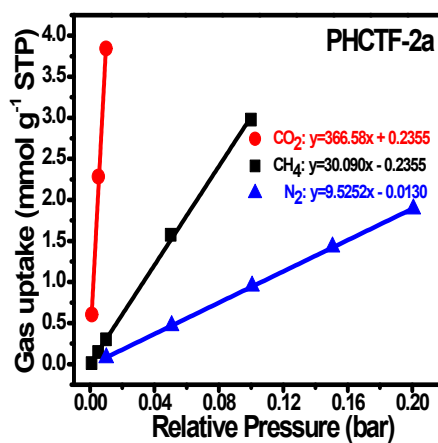

Figure S9. Adsorption selectivity of CO<sub>2</sub> over CH<sub>4</sub> and N<sub>2</sub> for PHCTF-2a calculated from Henry's law initial slope method at 273 K.

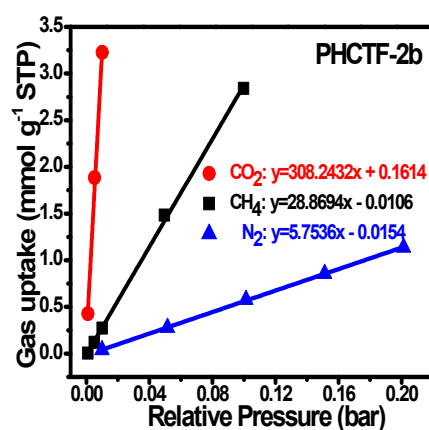

Figure S10. Adsorption selectivity of CO<sub>2</sub> over CH<sub>4</sub> and N<sub>2</sub> for PHCTF-2b calculated from Henry's law initial slope method at 273 K.
